# Supplementary material for: Phytochemical profiling and antioxidant activity assessment of Bellevalia pseudolongipes via liquid chromatography-high-resolution mass spectrometry
Source: PeerJ. 2024 Sep 13;12:e18046. doi: 10.7717/peerj.18046 (PMC11404456; doi:10.7717/peerj.18046)
Supplement: Supplemental Information 1 [file peerj-12-18046-s001.xlsx]

## Sheet: Sheet1_siirtA16
Quantitation Report
Lab Name:	Default Laboratory
Instrument:	Thermo Scientific Instrument							Method:	FENOLICQUAN-13_FENILICQUAN
User:	Thermo								FENILICQUAN
Batch:	FENOLICQUAN-13							Cali File:	FENOLICQUAN-13.calx
Vial Pos		Sample ID		File Name			Sample Name		File Date		Comment
gc1				siirtA16					2023-01-03 13:38:38
Internal Standards		RT		Quan Peak					Injected Conc	Units	Calculated Conc	Units	Flags
No data
Surrogates		RT		Quan Peak		Curve Type	Average RF/ Response Ratio		Injected Conc	Units	Calculated Conc	Units	Flags
No data
Target Compounds		RT		Quan Peak		Curve Type	Average RF/ Response Ratio		Injected Conc	Units	Calculated Conc	Units	Flags		Fenolik Bileşik Profili/ Phenolic Compound Profile	Sonuç/Result	Birim/Unit	METOT/ Method
101-)Benzoic acid		8.93		121.02940 mz		Linear	0		48.755	ppb	48.755	ppb			101-)Benzoic acid	48.755	mg/kg	LC-MS/MS
102-) 4-Hydroxybenzoic acid		6.15		137.02442 mz		Linear	0		8.709	ppb	8.709	ppb			102-) 4-Hydroxybenzoic acid	8.709	mg/kg	LC-MS/MS
103-) Salicylic acid		9.9		137.02442 mz		Linear	0		N/F	ppb	N/F	ppb			103-) Salicylic acid	N/F	mg/kg	LC-MS/MS
104-)3-hydroxybenzoic acid (3-HBA)		6.86		137.02442 mz		Linear	0		0.186	ppb	0.186	ppb			104-)3-hydroxybenzoic acid (3-HBA)	0.186	mg/kg	LC-MS/MS
105-)3-hydroxyphenylacetic acid (3-HPA)		6.77		107.05053 mz		Linear	0		221.558	ppb	221.558	ppb			105-)3-hydroxyphenylacetic acid (3-HPA)	221.558	mg/kg	LC-MS/MS
106-)Syringic acid		7.46		197.04555 mz		Linear	0		14.118	ppb	14.118	ppb			106-)Syringic acid	14.118	mg/kg	LC-MS/MS
107-)Gallic acid(3,4,5-trihydroxybenzoic acid)		0.86		169.01425 mz		Linear	0		10.499	ppb	10.499	ppb			107-)Gallic acid(3,4,5-trihydroxybenzoic acid)	10.499	mg/kg	LC-MS/MS
108-)Protocatechuic acid (3,4-Dihydroxybenzoic acid)		4.26		153.01933 mz		Linear	0		6.962	ppb	6.962	ppb			108-)Protocatechuic acid (3,4-Dihydroxybenzoic acid)	6.962	mg/kg	LC-MS/MS
109-)Protocatechuic acid ethyl ester (Ethyl 3,4-Dihydroxybenzoate)		N/F		181.05063 mz		Linear	0		N/F	ppb	N/F	ppb			109-)Protocatechuic acid ethyl ester (Ethyl 3,4-Dihydroxybenzoate)	N/F	mg/kg	LC-MS/MS
110-)3,4-dihydroxybenzaldehyde (Protocatechuic aldehyde)		5.6		137.02442 mz		Linear	0		24.666	ppb	24.666	ppb			110-)3,4-dihydroxybenzaldehyde (Protocatechuic aldehyde)	24.666	mg/kg	LC-MS/MS
111-)2,4-dihydroxybenzoic acid (beta-Resorcylic acid)		N/F		153.01933 mz		Linear	0		N/F	ppb	N/F	ppb			111-)2,4-dihydroxybenzoic acid (beta-Resorcylic acid)	N/F	mg/kg	LC-MS/MS
112-)Vanillic acid		7.1		167.03498 mz		Linear	0		35.353	ppb	35.353	ppb			112-)Vanillic acid	35.353	mg/kg	LC-MS/MS
113-)Homovanillic acid((4-Hydroxy-3-methoxyphenylacetic acid)		7.45		181.05063 mz		Linear	0		27.639	ppb	27.639	ppb			113-)Homovanillic acid((4-Hydroxy-3-methoxyphenylacetic acid)	27.639	mg/kg	LC-MS/MS
114-)Vanillin		7.6		151.04007 mz		Linear	0		29.377	ppb	29.377	ppb			114-)Vanillin	29.377	mg/kg	LC-MS/MS
115-)Gentisic acid		6.53		153.01933 mz		Linear	0		N/F	ppb	N/F	ppb			115-)Gentisic acid	N/F	mg/kg	LC-MS/MS
116-)3,4-Dihydroxyphenylacetic acid(DOPAC, Homoprotocatechuic acid)		7.1		167.03498 mz		Linear	0		35.353	ppb	35.353	ppb			116-)3,4-Dihydroxyphenylacetic acid(DOPAC, Homoprotocatechuic acid)	35.353	mg/kg	LC-MS/MS
117-)trans Cinnamic acid		10		147.04515 mz		Linear	0		3331.91	ppb	3331.91	ppb			117-)trans Cinnamic acid	3331.91	mg/kg	LC-MS/MS
118-)coumaric acid (trans-3-Hydroxycinnamic acid)		8.26		163.04007 mz		Linear	0		2.503	ppb	2.503	ppb			118-)coumaric acid (trans-3-Hydroxycinnamic acid)	2.503	mg/kg	LC-MS/MS
119-)Caffeic acid		7.2		179.03498 mz		Linear	0		259.684	ppb	259.684	ppb			119-)Caffeic acid	259.684	mg/kg	LC-MS/MS
120-)Caffeic acid phenhyl ester (CAPE)		12.32		283.09758 mz		Linear	0		N/F	ppb	N/F	ppb			120-)Caffeic acid phenhyl ester (CAPE)	N/F	mg/kg	LC-MS/MS
121-)Ferulic acid		8.53		193.05063 mz		Linear	0		N/F	ppb	N/F	ppb			121-)Ferulic acid	N/F	mg/kg	LC-MS/MS
122-)Sinapic acid		8.57		223.06120 mz		Linear	0		N/F	ppb	N/F	ppb			122-)Sinapic acid	N/F	mg/kg	LC-MS/MS
123-)Chlorogenic acid		7.07		353.08781 mz		Linear	0		N/F	ppb	N/F	ppb			123-)Chlorogenic acid	N/F	mg/kg	LC-MS/MS
124-)Quinic acid		1.17		191.05611 mz		Linear	0		13.9	ppb	13.9	ppb			124-)Quinic acid	13.9	mg/kg	LC-MS/MS
127) α-Cyano-4-hydroxycinnamic acid		9.43		188.03532 mz		Linear	0		N/F	ppb	N/F	ppb			127) α-Cyano-4-hydroxycinnamic acid	N/F	mg/kg	LC-MS/MS
128-)Catechin (Cianidanol)-p		N/F		289.07176 mz		Linear	0		N/F	ppb	N/F	ppb			128-)Catechin (Cianidanol)-p	N/F	mg/kg	LC-MS/MS
129-)Epigallocatechin		N/F		305.06668 mz		Linear	0		N/F	ppb	N/F	ppb			129-)Epigallocatechin	N/F	mg/kg	LC-MS/MS
130-)Epigallocatechin gallate		N/F		457.07763 mz		Linear	0		N/F	ppb	N/F	ppb			130-)Epigallocatechin gallate	N/F	mg/kg	LC-MS/MS
131-)Chrysin (5,7-Dihydroxy-2-phenyl-4H-chromen-4-one)		12.16		253.05063 mz		Linear	0		N/F	ppb	N/F	ppb			131-)Chrysin (5,7-Dihydroxy-2-phenyl-4H-chromen-4-one)	N/F	mg/kg	LC-MS/MS
132-)Apigenin (5,7-Dihydroxy-2-(4-hydroxyphenyl)-4H-chromen-4-one)		10.98		269.04555 mz		Linear	0		N/F	ppb	N/F	ppb			132-)Apigenin (5,7-Dihydroxy-2-(4-hydroxyphenyl)-4H-chromen-4-one)	N/F	mg/kg	LC-MS/MS
133-)Acacetin (5,7-Dihydroxy-2-(4-methoxyphenyl)-4H-chromen-4-one)		12.38		283.06120 mz		Linear	0		N/F	ppb	N/F	ppb			133-)Acacetin (5,7-Dihydroxy-2-(4-methoxyphenyl)-4H-chromen-4-one)	N/F	mg/kg	LC-MS/MS
134-)Rhoifolin ( Apigenin 7-O- neohesperidoside)		9.33		577.15692 mz		Linear	0		N/F	ppb	N/F	ppb			134-)Rhoifolin ( Apigenin 7-O- neohesperidoside)	N/F	mg/kg	LC-MS/MS
135-)Vicenin 2		N/F		593.15119 mz		Linear	0		N/F	ppb	N/F	ppb			135-)Vicenin 2	N/F	mg/kg	LC-MS/MS
136-) Apigenin 7-glucuronide		10.38		445.07763 mz		Linear	0		N/F	ppb	N/F	ppb			136-) Apigenin 7-glucuronide	N/F	mg/kg	LC-MS/MS
137-) Apigenin 7-glucoside		9.57		431.09837 mz		Linear	0		15.696	ppb	15.696	ppb			137-) Apigenin 7-glucoside	15.696	mg/kg	LC-MS/MS
138-)Genkwanin(4’,5-Dihydroxy-7-metthoxyflavone, Apigenin 7-O-methyl ether)		12.38		283.06120 mz		Linear	0		N/F	ppb	N/F	ppb			138-)Genkwanin(4’,5-Dihydroxy-7-metthoxyflavone, Apigenin 7-O-methyl ether)	N/F	mg/kg	LC-MS/MS
139-) Apiin (Apigenin-7-(2-O-apiosylglucoside)		9.54		565.15179 mz		Linear	0		79.875	ppb	79.875	ppb			139-) Apiin (Apigenin-7-(2-O-apiosylglucoside)	79.875	mg/kg	LC-MS/MS
140-) Vitexin (Apigenin 8-C-glucoside)		8.7		431.09837 mz		Linear	0		277.122	ppb	277.122	ppb			140-) Vitexin (Apigenin 8-C-glucoside)	277.122	mg/kg	LC-MS/MS
141-)Schaftoside		8.31		563.14063 mz		Linear	0		837.932	ppb	837.932	ppb			141-)Schaftoside	837.932	mg/kg	LC-MS/MS
143-) Rutin hydrate M-OH2		N/F		609.14611 mz		Linear	0		N/F	ppb	N/F	ppb			143-) Rutin hydrate M-OH2	N/F	mg/kg	LC-MS/MS
144-) Luteolin		10.74		285.04046 mz		Linear	0		124.969	ppb	124.969	ppb			144-) Luteolin	124.969	mg/kg	LC-MS/MS
145-) Luteolin-7-O-glucuronide (Luteolin-7-O-β-D-glucuronide)		N/F		461.07255 mz		Linear	0		N/F	ppb	N/F	ppb			145-) Luteolin-7-O-glucuronide (Luteolin-7-O-β-D-glucuronide)	N/F	mg/kg	LC-MS/MS
146-) Diosmetin (Luteolin 4′-methyl ether)		11.3		299.05611 mz		Linear	0		12.85	ppb	12.85	ppb			146-) Diosmetin (Luteolin 4′-methyl ether)	12.85	mg/kg	LC-MS/MS
147-) Orientin		8.41		447.09328 mz		Linear	0		1308.65	ppb	1308.65	ppb			147-) Orientin	1308.65	mg/kg	LC-MS/MS
148-) Isoorientin		8.41		447.09328 mz		Linear	0		1308.65	ppb	1308.65	ppb			148-) Isoorientin	1308.65	mg/kg	LC-MS/MS
149-) Luteoloside (Luteolin 7-glucoside)		9.07		447.09290 mz		Linear	0		78.76	ppb	78.76	ppb			149-) Luteoloside (Luteolin 7-glucoside)	78.76	mg/kg	LC-MS/MS
150-) Luteolin 7-rutinoside		8.99		595.16376 mz		Linear	0		32.313	ppb	32.313	ppb			150-) Luteolin 7-rutinoside	32.313	mg/kg	LC-MS/MS
151-) Galangin (3,5,7-Trihydroxy-2-phenyl-4H-chromen-4-one)		12.28		269.04555 mz		Linear	0		N/F	ppb	N/F	ppb			151-) Galangin (3,5,7-Trihydroxy-2-phenyl-4H-chromen-4-one)	N/F	mg/kg	LC-MS/MS
152-) Quercetin		10.45		301.03538 mz		Linear	0		8.241	ppb	8.241	ppb			152-) Quercetin	8.241	mg/kg	LC-MS/MS
153-) İsoquercitrin (Quercetin 3-glucoside)		9.12		463.08820 mz		Linear	0		43.656	ppb	43.656	ppb			153-) İsoquercitrin (Quercetin 3-glucoside)	43.656	mg/kg	LC-MS/MS
154-) Narcissin (Narcissoside, Isorhamnetin 3-rutinoside)		N/F		623.16176 mz		Linear	0		N/F	ppb	N/F	ppb			154-) Narcissin (Narcissoside, Isorhamnetin 3-rutinoside)	N/F	mg/kg	LC-MS/MS
155-) Quercetin 3-rutinoside 7-glucoside		N/F		771.20374 mz		Linear	0		N/F	ppb	N/F	ppb			155-) Quercetin 3-rutinoside 7-glucoside	N/F	mg/kg	LC-MS/MS
156-) Isorhamnetin (Quercetin 3′-methyl ether)		11.23		315.05103 mz		Linear	0		N/F	ppb	N/F	ppb			156-) Isorhamnetin (Quercetin 3′-methyl ether)	N/F	mg/kg	LC-MS/MS
157-) Hyperoside (Quercetin 3-D-galactoside)		9.12		463.08820 mz		Linear	0		43.656	ppb	43.656	ppb			157-) Hyperoside (Quercetin 3-D-galactoside)	43.656	mg/kg	LC-MS/MS
158-) Kaempferol		N/F		287.05350 mz		Linear	0		N/F	ppb	N/F	ppb			158-) Kaempferol	N/F	mg/kg	LC-MS/MS
159-) Afzelin (Kaempferol 3-rhamnoside)		10.14		431.09837 mz		Linear	0		3.674	ppb	3.674	ppb			159-) Afzelin (Kaempferol 3-rhamnoside)	3.674	mg/kg	LC-MS/MS
160-) Kaempferide		12.33		299.05611 mz		Linear	0		N/F	ppb	N/F	ppb			160-) Kaempferide	N/F	mg/kg	LC-MS/MS
161-) Kaempferitrin		9.28		579.17083 mz		Linear	0		N/F	ppb	N/F	ppb			161-) Kaempferitrin	N/F	mg/kg	LC-MS/MS
162-) Nicotiflorin (Kaempferol 3-rutinoside, Kaempferol 3-O-β –rutinoside)		9.67		593.15106 mz		Linear	0		N/F	ppb	N/F	ppb			162-) Nicotiflorin (Kaempferol 3-rutinoside, Kaempferol 3-O-β –rutinoside)	N/F	mg/kg	LC-MS/MS
163-) Astragalin (Kaempferol 3-glucoside)		9.48		447.09328 mz		Linear	0		N/F	ppb	N/F	ppb			163-) Astragalin (Kaempferol 3-glucoside)	N/F	mg/kg	LC-MS/MS
164-) Tiliroside		N/F		595.14264 mz		Linear	0		N/F	ppb	N/F	ppb			164-) Tiliroside	N/F	mg/kg	LC-MS/MS
165-) Leucoside (Kaempferol 3-sambubioside)		9.82		289.06924 mz		Linear	0		N/F	ppb	N/F	ppb			165-) Leucoside (Kaempferol 3-sambubioside)	N/F	mg/kg	LC-MS/MS
167-) Fisetin hydrate		9.84		285.04046 mz		Linear	0		2.304	ppb	2.304	ppb			167-) Fisetin hydrate	2.304	mg/kg	LC-MS/MS
168-) Naringin		9.26		609.18390 mz		Linear	0		N/F	ppb	N/F	ppb			168-) Naringin	N/F	mg/kg	LC-MS/MS
169-) Naringenin		10.45		271.06120 mz		Linear	0		N/F	ppb	N/F	ppb			169-) Naringenin	N/F	mg/kg	LC-MS/MS
170-) Sakuranetin (Naringenin 7-O-methyl ether)		N/F		285.07685 mz		Linear	0		N/F	ppb	N/F	ppb			170-) Sakuranetin (Naringenin 7-O-methyl ether)	N/F	mg/kg	LC-MS/MS
171-) Narirutin (Narirutinsa, Naringenin rutinoside)		8.65		579.17193 mz		Linear	0		472.752	ppb	472.752	ppb			171-) Narirutin (Narirutinsa, Naringenin rutinoside)	472.752	mg/kg	LC-MS/MS
173-) Hesperidin		9.26		609.18249 mz		Linear	0		0.009	ppb	0.009	ppb			173-) Hesperidin	0.009	mg/kg	LC-MS/MS
174-) Neohesperidin		9.26		609.18249 mz		Linear	0		0.009	ppb	0.009	ppb			174-) Neohesperidin	0.009	mg/kg	LC-MS/MS
175-) Eriodictyol (3,4,5,7-Tetrahydroxyflavanone)		9.29		287.05501 mz		Linear	0		N/F	ppb	N/F	ppb			175-) Eriodictyol (3,4,5,7-Tetrahydroxyflavanone)	N/F	mg/kg	LC-MS/MS
176-) Eriocitrin		N/F		595.16684 mz		Linear	0		N/F	ppb	N/F	ppb			176-) Eriocitrin	N/F	mg/kg	LC-MS/MS
177-) Liquiritigenin		N/F		255.06628 mz		Linear	0		N/F	ppb	N/F	ppb			177-) Liquiritigenin	N/F	mg/kg	LC-MS/MS
178-) Liquiritin (4′,7-Dihydroxyflavanone 4′-glucoside)		N/F		417.11911 mz		Linear	0		N/F	ppb	N/F	ppb			178-) Liquiritin (4′,7-Dihydroxyflavanone 4′-glucoside)	N/F	mg/kg	LC-MS/MS
179-) Genistein (5,7-Dihydroxy-3-(4-hydroxyphenyl)-4H-chromen-4-one)		10.98		269.04555 mz		Linear	0		N/F	ppb	N/F	ppb			179-) Genistein (5,7-Dihydroxy-3-(4-hydroxyphenyl)-4H-chromen-4-one)	N/F	mg/kg	LC-MS/MS
180-) Daidzin		8.03		255.06433 mz		Linear	0		N/F	ppb	N/F	ppb			180-) Daidzin	N/F	mg/kg	LC-MS/MS
181-) Formononetin (Neochanin)		11.35		267.06628 mz		Linear	0		N/F	ppb	N/F	ppb			181-) Formononetin (Neochanin)	N/F	mg/kg	LC-MS/MS
182-) Kuromanine (Cyanidin 3-glucoside chloride)		9.48		447.09328 mz		Linear	0		N/F	ppb	N/F	ppb			182-) Kuromanine (Cyanidin 3-glucoside chloride)	N/F	mg/kg	LC-MS/MS
183-) ellagic acid		9.43		300.99899 mz		Linear	0		74.263	ppb	74.263	ppb			183-) ellagic acid	74.263	mg/kg	LC-MS/MS
184-) Esculin hydrate		5.94		339.07216 mz		Linear	0		1.643	ppb	1.643	ppb			184-) Esculin hydrate	1.643	mg/kg	LC-MS/MS
185-) Phloridzin		N/F		435.12967 mz		Linear	0		N/F	ppb	N/F	ppb			185-) Phloridzin	N/F	mg/kg	LC-MS/MS
186-) Rosmarinic acid		9.71		359.07724 mz		Linear	0		14.426	ppb	14.426	ppb			186-) Rosmarinic acid	14.426	mg/kg	LC-MS/MS
187-) Glabridin		N/F		323.12888 mz		Linear	0		N/F	ppb	N/F	ppb			187-) Glabridin	N/F	mg/kg	LC-MS/MS
188-) Arbutin		0.67		271.08233 mz		Linear	0		85.031	ppb	85.031	ppb			188-) Arbutin	85.031	mg/kg	LC-MS/MS
189-) emodin		13.75		269.04555 mz		Linear	0		N/F	ppb	N/F	ppb			189-) emodin	N/F	mg/kg	LC-MS/MS
190-) Etoposide		N/F		383.11053 mz		Linear	0		N/F	ppb	N/F	ppb			190-) Etoposide	N/F	mg/kg	LC-MS/MS
191-) Procyanidin B2		6.51		577.13515 mz		Linear	0		7.652	ppb	7.652	ppb			191-) Procyanidin B2	7.652	mg/kg	LC-MS/MS
192-) Doxorubicin Hydrchloride		N/F		544.18134 mz		Linear	0		N/F	ppb	N/F	ppb			192-) Doxorubicin Hydrchloride	N/F	mg/kg	LC-MS/MS
193-) ethylgallate		7.95		197.04555 mz		Linear	0		N/F	ppb	N/F	ppb			193-) ethylgallate	N/F	mg/kg	LC-MS/MS
