# Supplementary material for: Phytochemical profiling and antioxidant activity assessment of Bellevalia pseudolongipes via liquid chromatography-high-resolution mass spectrometry
Source: PeerJ. 2024 Sep 13;12:e18046. doi: 10.7717/peerj.18046 (PMC11404456; doi:10.7717/peerj.18046)
Supplement: Supplemental Information 4 [file peerj-12-18046-s004.xlsx]

## Sheet: Sheet1_100ppb-3
Confirmation Report
Lab Name:	Default Laboratory
Instrument:	Thermo Scientific Instrument					Method:	FENOLICQUAN-13_FENILICQUAN
User:	Thermo						FENILICQUAN
Batch:	FENOLICQUAN-13					Cali File:	FENOLICQUAN-13.calx
Vial Pos	Sample ID		File Name		Level	Sample Name		File Date	Comment
ga6			100ppb-3		100			2022-12-24 17:08:31
107-)Gallic acid(3,4,5-trihydroxybenzoic acid)							Quan Peak:	m/z169.01425 mz
	Injected		Sample		Flags
Conc:	95.898	ppb	95.898	ppb
Retention Time:		0.791926
Area:		34937930
Height:		5145412
	**MANUAL SETTINGS**
Calibration Curve
							Qual Ion 1:	1000.00000->125.02461 mz
							Ratio: 53.45% Range: 4.00 - 6.00%
							Qual Ion 2:	N/A mz
							Overlay
188-) Arbutin							Quan Peak:	m/z271.08233 mz
	Injected		Sample		Flags
Conc:	97.398	ppb	97.398	ppb
Retention Time:		0.791926
Area:		14475674
Height:		1999924
	**MANUAL SETTINGS**
Calibration Curve
							Qual Ion 1:	1000.00000->108.02180 mz
							Ratio: 244.16% Range: 4.00 - 6.00%
							Qual Ion 2:	N/A mz
							Overlay
172-) Taxifolin M+3H							Quan Peak:	1000.00000->162.02118 mz
	Injected		Sample		Flags
Conc:	104.521	ppb	104.521	ppb
Retention Time:		1.18277
Area:		2531826
Height:		373555
	**MANUAL SETTINGS**
Calibration Curve
							Qual Ion 1:	1000.00000->85.02972 mz
							Ratio: 1667.77% Range: 0.00 - 0.00%
							Qual Ion 2:	N/A mz
							Overlay
124-)Quinic acid							Quan Peak:	m/z191.05611 mz
	Injected		Sample		Flags
Conc:	89.241	ppb	89.241	ppb
Retention Time:		1.18913
Area:		135702886
Height:		24234296
	**MANUAL SETTINGS**
Calibration Curve
							Qual Ion 1:	1000.00000->85.02962 mz
							Ratio: 31.13% Range: 4.00 - 6.00%
							Qual Ion 2:	N/A mz
							Overlay
108-)Protocatechuic acid (3,4-Dihydroxybenzoic acid)							Quan Peak:	m/z153.01933 mz
	Injected		Sample		Flags
Conc:	60.055	ppb	60.055	ppb
Retention Time:		4.18879
Area:		141058196
Height:		7317750
	**MANUAL SETTINGS**
Calibration Curve
							Qual Ion 1:	1000.00000->109.02949 mz
							Ratio: 42.08% Range: 4.00 - 6.00%
							Qual Ion 2:	N/A mz
							Overlay
110-)3,4-dihydroxybenzaldehyde (Protocatechuic aldehyde)							Quan Peak:	m/z137.02442 mz
	Injected		Sample		Flags
Conc:	99.858	ppb	99.858	ppb
Retention Time:		5.56777
Area:		851397941
Height:		42579311
	**MANUAL SETTINGS**
Calibration Curve
							Qual Ion 1:	1000.00000->136.01671 mz
							Ratio: 34.80% Range: 4.00 - 6.00%
							Qual Ion 2:	N/A mz
							Overlay
184-) Esculin hydrate							Quan Peak:	m/z339.07216 mz
	Injected		Sample		Flags
Conc:	97.416	ppb	97.416	ppb
Retention Time:		6.20605
Area:		183872780
Height:		10809314
	**MANUAL SETTINGS**
Calibration Curve
							Qual Ion 1:	1000.00000->177.01930 mz
							Ratio: 158.63% Range: 4.00 - 6.00%
							Qual Ion 2:	N/A mz
							Overlay
102-) 4-Hydroxybenzoic acid							Quan Peak:	m/z137.02442 mz
	Injected		Sample		Flags
Conc:	100.38	ppb	100.38	ppb
Retention Time:		6.10232
Area:		227352482
Height:		13110736
	**MANUAL SETTINGS**
Calibration Curve
							Qual Ion 1:	1000.00000->93.03471 mz
							Ratio: 95.34% Range: 4.00 - 6.00%
							Qual Ion 2:	N/A mz
							Overlay
129-)Epigallocatechin							Quan Peak:	m/z305.06668 mz
	Injected		Sample		Flags
Conc:	95.813	ppb	95.813	ppb
Retention Time:		6.27488
Area:		90622568
Height:		7284731
	**MANUAL SETTINGS**
Calibration Curve
							Qual Ion 1:	1000.00000->125.02415 mz
							Ratio: 114.72% Range: 4.00 - 6.00%
							Qual Ion 2:	N/A mz
							Overlay
128-)Catechin (Cianidanol)-p							Quan Peak:	m/z289.07176 mz
	Injected		Sample		Flags
Conc:	125.796	ppb	125.796	ppb
Retention Time:		6.3441
Area:		184592304
Height:		10791175
	**MANUAL SETTINGS**
Calibration Curve
							Qual Ion 1:	1000.00000->109.02975 mz
							Ratio: 24.57% Range: 4.00 - 6.00%
							Qual Ion 2:	N/A mz
							Overlay
115-)Gentisic acid							Quan Peak:	m/z153.01933 mz
	Injected		Sample		Flags
Conc:	96.743	ppb	96.743	ppb
Retention Time:		6.39577
Area:		373982832
Height:		36578919
	**MANUAL SETTINGS**
Calibration Curve
							Qual Ion 1:	1000.00000->108.02176 mz
							Ratio: 96.94% Range: 4.00 - 6.00%
							Qual Ion 2:	N/A mz
							Overlay
191-) Procyanidin B2							Quan Peak:	m/z577.13515 mz
	Injected		Sample		Flags
Conc:	100.726	ppb	100.726	ppb
Retention Time:		6.72353
Area:		19159988
Height:		2255826
	**MANUAL SETTINGS**
Calibration Curve
							Qual Ion 1:	1000.00000->407.07831 mz
							Ratio: 43.39% Range: 4.00 - 6.00%
							Qual Ion 2:	N/A mz
							Overlay
104-)3-hydroxybenzoic acid (3-HBA)							Quan Peak:	m/z137.02442 mz
	Injected		Sample		Flags
Conc:	100.066	ppb	100.066	ppb
Retention Time:		6.8789
Area:		249916175
Height:		19524265
	**MANUAL SETTINGS**
Calibration Curve
							Qual Ion 1:	1000.00000->93.03471 mz
							Ratio: 0.00% Range: 4.00 - 6.00%
							Qual Ion 2:	N/A mz
							Overlay
123-)Chlorogenic acid							Quan Peak:	m/z353.08781 mz
	Injected		Sample		Flags
Conc:	101.344	ppb	101.344	ppb
Retention Time:		7.01706
Area:		136831604
Height:		15578859
	**MANUAL SETTINGS**
Calibration Curve
							Qual Ion 1:	1000.00000->191.05624 mz
							Ratio: 172.94% Range: 4.00 - 6.00%
							Qual Ion 2:	N/A mz
							Overlay
105-)3-hydroxyphenylacetic acid (3-HPA)							Quan Peak:	1000.00000->107.05053 mz
	Injected		Sample		Flags
Conc:	116.479	ppb	116.479	ppb
Retention Time:		6.85534
Area:		5854115
Height:		557177
	**MANUAL SETTINGS**
Calibration Curve
							Qual Ion 1:	m/z107.05053 mz
							Ratio: 0.00% Range: 0.00 - 0.00%
							Qual Ion 2:	N/A mz
							Overlay
130-)Epigallocatechin gallate							Quan Peak:	m/z457.07763 mz
	Injected		Sample		Flags
Conc:	103.233	ppb	103.233	ppb
Retention Time:		7.17236
Area:		61471509
Height:		4775509
	**MANUAL SETTINGS**
Calibration Curve
							Qual Ion 1:	1000.00000->169.01399 mz
							Ratio: 186.02% Range: 4.00 - 6.00%
							Qual Ion 2:	N/A mz
							Overlay
112-)Vanillic acid							Quan Peak:	m/z167.03498 mz
	Injected		Sample		Flags
Conc:	88.794	ppb	88.794	ppb
Retention Time:		7.03426
Area:		22199338
Height:		1533736
	**MANUAL SETTINGS**
Calibration Curve
							Qual Ion 1:	1000.00000->108.02173 mz
							Ratio: 91.29% Range: 4.00 - 6.00%
							Qual Ion 2:	N/A mz
							Overlay
116-)3,4-Dihydroxyphenylacetic acid(DOPAC, Homoprotocatechuic acid)							Quan Peak:	m/z167.03498 mz
	Injected		Sample		Flags
Conc:	88.794	ppb	88.794	ppb
Retention Time:		7.03426
Area:		22199338
Height:		1533736
	**MANUAL SETTINGS**
Calibration Curve
							Qual Ion 1:	1000.00000->152.01151 mz
							Ratio: 38.15% Range: 4.00 - 6.00%
							Qual Ion 2:	N/A mz
							Overlay
113-)Homovanillic acid((4-Hydroxy-3-methoxyphenylacetic acid)							Quan Peak:	m/z181.05063 mz
	Injected		Sample		Flags
Conc:	98.507	ppb	98.507	ppb
Retention Time:		7.25851
Area:		13959038
Height:		1201416
	**MANUAL SETTINGS**
Calibration Curve
							Qual Ion 1:	1000.00000->137.06108 mz
							Ratio: 0.00% Range: 4.00 - 6.00%
							Qual Ion 2:	N/A mz
							Overlay
119-)Caffeic acid							Quan Peak:	m/z179.03498 mz
	Injected		Sample		Flags
Conc:	97.846	ppb	97.846	ppb
Retention Time:		7.15516
Area:		573471670
Height:		45513140
	**MANUAL SETTINGS**
Calibration Curve
							Qual Ion 1:	1000.00000->135.04509 mz
							Ratio: 0.00% Range: 4.00 - 6.00%
							Qual Ion 2:	N/A mz
							Overlay
111-)2,4-dihydroxybenzoic acid (beta-Resorcylic acid)							Quan Peak:	m/z153.01933 mz
	Injected		Sample		Flags
Conc:	99.489	ppb	99.489	ppb
Retention Time:		7.06869
Area:		642061902
Height:		65047143
	**MANUAL SETTINGS**
Calibration Curve
							Qual Ion 1:	1000.00000->67.01888 mz
							Ratio: 16.82% Range: 4.00 - 6.00%
							Qual Ion 2:	N/A mz
							Overlay
155-) Quercetin 3-rutinoside 7-glucoside							Quan Peak:	m/z771.20374 mz
	Injected		Sample		Flags
Conc:	92.998	ppb	92.998	ppb
Retention Time:		7.39677
Area:		20003412
Height:		2053547
	**MANUAL SETTINGS**
Calibration Curve
							Qual Ion 1:	1000.00000->303.04846 mz
							Ratio: 330.90% Range: 0.00 - 0.00%
							Qual Ion 2:	N/A mz
							Overlay
106-)Syringic acid							Quan Peak:	m/z197.04555 mz
	Injected		Sample		Flags
Conc:	95.174	ppb	95.174	ppb
Retention Time:		7.43117
Area:		37103817
Height:		3779449
	**MANUAL SETTINGS**
Calibration Curve
							Qual Ion 1:	1000.00000->121.02975 mz
							Ratio: 21.15% Range: 4.00 - 6.00%
							Qual Ion 2:	N/A mz
							Overlay
114-)Vanillin							Quan Peak:	m/z151.04007 mz
	Injected		Sample		Flags
Conc:	95.178	ppb	95.178	ppb
Retention Time:		7.5694
Area:		139615660
Height:		9444764
	**MANUAL SETTINGS**
Calibration Curve
							Qual Ion 1:	1000.00000->108.02178 mz
							Ratio: 27.78% Range: 4.00 - 6.00%
							Qual Ion 2:	N/A mz
							Overlay
135-)Vicenin 2							Quan Peak:	m/z593.15119 mz
	Injected		Sample		Flags
Conc:	99.585	ppb	99.585	ppb
Retention Time:		7.81137
Area:		98540200
Height:		9034644
	**MANUAL SETTINGS**
Calibration Curve
							Qual Ion 1:	1000.00000->473.10941 mz
							Ratio: 0.00% Range: 4.00 - 6.00%
							Qual Ion 2:	N/A mz
							Overlay
125-) 3-(4-Hydroxyphenyl) propionic acid							Quan Peak:	m/z165.05572 mz
	Injected		Sample		Flags
Conc:	89.392	ppb	89.392	ppb
Retention Time:		8.00129
Area:		764358
Height:		124511
	**MANUAL SETTINGS**
Calibration Curve
							Qual Ion 1:	1000.00000->108.02195 mz
							Ratio: 5075.93% Range: 4.00 - 6.00%
							Qual Ion 2:	N/A mz
							Overlay
193-) ethylgallate							Quan Peak:	m/z197.04555 mz
	Injected		Sample		Flags
Conc:	98.744	ppb	98.744	ppb
Retention Time:		7.79417
Area:		771071434
Height:		75857201
	**MANUAL SETTINGS**
Calibration Curve
							Qual Ion 1:	1000.00000->124.01682 mz
							Ratio: 32.51% Range: 4.00 - 6.00%
							Qual Ion 2:	N/A mz
							Overlay
180-) Daidzin							Quan Peak:	1000.00000->255.06433 mz
	Injected		Sample		Flags
Conc:	99.883	ppb	99.883	ppb
Retention Time:		8.02952
Area:		532870078
Height:		51837771
	**MANUAL SETTINGS**
Calibration Curve
							Qual Ion 1:	m/z417.11801 mz
							Ratio: 56.57% Range: 0.00 - 0.00%
							Qual Ion 2:	N/A mz
							Overlay
141-)Schaftoside							Quan Peak:	m/z563.14063 mz
	Injected		Sample		Flags
Conc:	101.966	ppb	101.966	ppb
Retention Time:		8.31234
Area:		106868270
Height:		12256481
	**MANUAL SETTINGS**
Calibration Curve
							Qual Ion 1:	1000.00000->443.09949 mz
							Ratio: 0.00% Range: 4.00 - 6.00%
							Qual Ion 2:	N/A mz
							Overlay
176-) Eriocitrin							Quan Peak:	m/z595.16684 mz
	Injected		Sample		Flags
Conc:	100.568	ppb	100.568	ppb
Retention Time:		8.24306
Area:		138785781
Height:		15677982
	**MANUAL SETTINGS**
Calibration Curve
							Qual Ion 1:	1000.00000->287.05569 mz
							Ratio: 0.00% Range: 4.00 - 6.00%
							Qual Ion 2:	N/A mz
							Overlay
118-)coumaric acid (trans-3-Hydroxycinnamic acid)							Quan Peak:	m/z163.04007 mz
	Injected		Sample		Flags
Conc:	98.126	ppb	98.126	ppb
Retention Time:		8.22585
Area:		515868208
Height:		61473234
	**MANUAL SETTINGS**
Calibration Curve
							Qual Ion 1:	1000.00000->119.05027 mz
							Ratio: 98.07% Range: 4.00 - 6.00%
							Qual Ion 2:	N/A mz
							Overlay
147-) Orientin							Quan Peak:	m/z447.09328 mz
	Injected		Sample		Flags
Conc:	99.12	ppb	99.12	ppb
Retention Time:		8.39859
Area:		382346134
Height:		32874295
	**MANUAL SETTINGS**
Calibration Curve
							Qual Ion 1:	1000.00000->327.05148 mz
							Ratio: 94.81% Range: 4.00 - 6.00%
							Qual Ion 2:	N/A mz
							Overlay
148-) Isoorientin							Quan Peak:	m/z447.09328 mz
	Injected		Sample		Flags
Conc:	99.12	ppb	99.12	ppb
Retention Time:		8.39859
Area:		382346134
Height:		32874295
	**MANUAL SETTINGS**
Calibration Curve
							Qual Ion 1:	1000.00000->327.05151 mz
							Ratio: 94.81% Range: 4.00 - 6.00%
							Qual Ion 2:	N/A mz
							Overlay
178-) Liquiritin (4′,7-Dihydroxyflavanone 4′-glucoside)							Quan Peak:	m/z417.11911 mz
	Injected		Sample		Flags
Conc:	102.859	ppb	102.859	ppb
Retention Time:		8.51965
Area:		251119055
Height:		31870588
	**MANUAL SETTINGS**
Calibration Curve
							Qual Ion 1:	1000.00000->255.06595 mz
							Ratio: 168.40% Range: 4.00 - 6.00%
							Qual Ion 2:	N/A mz
							Overlay
122-)Sinapic acid							Quan Peak:	m/z223.06120 mz
	Injected		Sample		Flags
Conc:	102.27	ppb	102.27	ppb
Retention Time:		8.51965
Area:		189310934
Height:		22812529
	**MANUAL SETTINGS**
Calibration Curve
							Qual Ion 1:	1000.00000->193.01436 mz
							Ratio: 32.38% Range: 4.00 - 6.00%
							Qual Ion 2:	N/A mz
							Overlay
121-)Ferulic acid							Quan Peak:	m/z193.05063 mz
	Injected		Sample		Flags
Conc:	100.706	ppb	100.706	ppb
Retention Time:		8.48509
Area:		380855983
Height:		47307076
	**MANUAL SETTINGS**
Calibration Curve
							Qual Ion 1:	1000.00000->134.03751 mz
							Ratio: 35.58% Range: 4.00 - 6.00%
							Qual Ion 2:	N/A mz
							Overlay
140-) Vitexin (Apigenin 8-C-glucoside)							Quan Peak:	m/z431.09837 mz
	Injected		Sample		Flags
Conc:	99.713	ppb	99.713	ppb
Retention Time:		8.65783
Area:		193971441
Height:		24956213
	**MANUAL SETTINGS**
Calibration Curve
							Qual Ion 1:	1000.00000->311.05603 mz
							Ratio: 0.44% Range: 4.00 - 6.00%
							Qual Ion 2:	N/A mz
							Overlay
171-) Narirutin (Narirutinsa, Naringenin rutinoside)							Quan Peak:	m/z579.17193 mz
	Injected		Sample		Flags
Conc:	102.482	ppb	102.482	ppb
Retention Time:		8.7961
Area:		117663871
Height:		15581873
	**MANUAL SETTINGS**
Calibration Curve
							Qual Ion 1:	1000.00000->271.06107 mz
							Ratio: 0.00% Range: 4.00 - 6.00%
							Qual Ion 2:	N/A mz
							Overlay
150-) Luteolin 7-rutinoside							Quan Peak:	m/z595.16376 mz
	Injected		Sample		Flags
Conc:	98.757	ppb	98.757	ppb
Retention Time:		8.97755
Area:		257003265
Height:		34527552
	**MANUAL SETTINGS**
Calibration Curve
							Qual Ion 1:	1000.00000->287.05371 mz
							Ratio: 752.11% Range: 4.00 - 6.00%
							Qual Ion 2:	N/A mz
							Overlay
101-)Benzoic acid							Quan Peak:	m/z121.02940 mz
	Injected		Sample		Flags
Conc:	136.574	ppb	136.574	ppb
Retention Time:		8.88244
Area:		36252737
Height:		2897254
	**MANUAL SETTINGS**
Calibration Curve
							Qual Ion 1:	1000.00000->121.02940 mz
							Ratio: 36.26% Range: 4.00 - 6.00%
							Qual Ion 2:	N/A mz
							Overlay
192-) Doxorubicin Hydrchloride							Quan Peak:	m/z544.18134 mz
	Injected		Sample		Flags
Conc:	100.085	ppb	100.085	ppb
Retention Time:		8.85637
Area:		41865299
Height:		5714228
	**MANUAL SETTINGS**
Calibration Curve
							Qual Ion 1:	1000.00000->321.07416 mz
							Ratio: 108.84% Range: 4.00 - 6.00%
							Qual Ion 2:	N/A mz
							Overlay
149-) Luteoloside (Luteolin 7-glucoside)							Quan Peak:	m/z447.09290 mz
	Injected		Sample		Flags
Conc:	99.942	ppb	99.942	ppb
Retention Time:		9.05525
Area:		206737349
Height:		29074558
	**MANUAL SETTINGS**
Calibration Curve
							Qual Ion 1:	1000.00000->285.03986 mz
							Ratio: 127.38% Range: 0.00 - 0.00%
							Qual Ion 2:	N/A mz
							Overlay
168-) Naringin							Quan Peak:	m/z609.18390 mz
	Injected		Sample		Flags
Conc:	97.833	ppb	97.833	ppb
Retention Time:		9.02079
Area:		80390652
Height:		10484881
	**MANUAL SETTINGS**
Calibration Curve
							Qual Ion 1:	1000.00000->609.18414 mz
							Ratio: 0.00% Range: 4.00 - 6.00%
							Qual Ion 2:	N/A mz
							Overlay
173-) Hesperidin							Quan Peak:	m/z609.18249 mz
	Injected		Sample		Flags
Conc:	99.965	ppb	99.965	ppb
Retention Time:		9.02079
Area:		74608775
Height:		10265363
	**MANUAL SETTINGS**
Calibration Curve
							Qual Ion 1:	1000.00000->301.07230 mz
							Ratio: 198.06% Range: 4.00 - 6.00%
							Qual Ion 2:	N/A mz
							Overlay
174-) Neohesperidin							Quan Peak:	m/z609.18249 mz
	Injected		Sample		Flags
Conc:	99.965	ppb	99.965	ppb
Retention Time:		9.02079
Area:		74608775
Height:		10265363
	**MANUAL SETTINGS**
Calibration Curve
							Qual Ion 1:	m/z285.04056 mz
							Ratio: 0.18% Range: 4.00 - 6.00%
							Qual Ion 2:	1000.00000->79.04205 mz
							Ratio: 0.00% Range: 4.00 - 6.00%
							Overlay
127) α-Cyano-4-hydroxycinnamic acid							Quan Peak:	m/z188.03532 mz
	Injected		Sample		Flags
Conc:	99.497	ppb	99.497	ppb
Retention Time:		9.2281
Area:		479000366
Height:		64167754
	**MANUAL SETTINGS**
Calibration Curve
							Qual Ion 1:	1000.00000->93.03470 mz
							Ratio: 109.82% Range: 4.00 - 6.00%
							Qual Ion 2:	N/A mz
							Overlay
143-) Rutin hydrate M-OH2							Quan Peak:	m/z609.14611 mz
	Injected		Sample		Flags
Conc:	102.478	ppb	102.478	ppb
Retention Time:		9.19366
Area:		67103999
Height:		10795202
	**MANUAL SETTINGS**
Calibration Curve
							Qual Ion 1:	1000.00000->611.15656 mz
							Ratio: 5.89% Range: 4.00 - 6.00%
							Qual Ion 2:	N/A mz
							Overlay
153-) İsoquercitrin (Quercetin 3-glucoside)							Quan Peak:	m/z463.08820 mz
	Injected		Sample		Flags
Conc:	99.956	ppb	99.956	ppb
Retention Time:		9.19366
Area:		426795697
Height:		53065261
	**MANUAL SETTINGS**
Calibration Curve
							Qual Ion 1:	1000.00000->300.02768 mz
							Ratio: 100.32% Range: 4.00 - 6.00%
							Qual Ion 2:	N/A mz
							Overlay
157-) Hyperoside (Quercetin 3-D-galactoside)							Quan Peak:	m/z463.08820 mz
	Injected		Sample		Flags
Conc:	99.956	ppb	99.956	ppb
Retention Time:		9.19366
Area:		426795697
Height:		53065261
	**MANUAL SETTINGS**
Calibration Curve
							Qual Ion 1:	1000.00000->300.02780 mz
							Ratio: 100.32% Range: 4.00 - 6.00%
							Qual Ion 2:	N/A mz
							Overlay
175-) Eriodictyol (3,4,5,7-Tetrahydroxyflavanone)							Quan Peak:	1000.00000->287.05501 mz
	Injected		Sample		Flags
Conc:	101.193	ppb	101.193	ppb
Retention Time:		9.22175
Area:		693190030
Height:		100996984
	**MANUAL SETTINGS**
Calibration Curve
							Qual Ion 1:	m/z287.05501 mz
							Ratio: 69.46% Range: 0.00 - 0.00%
							Qual Ion 2:	N/A mz
							Overlay
161-) Kaempferitrin							Quan Peak:	m/z579.17083 mz
	Injected		Sample		Flags
Conc:	99.59	ppb	99.59	ppb
Retention Time:		9.56521
Area:		298932074
Height:		36665344
	**MANUAL SETTINGS**
Calibration Curve
							Qual Ion 1:	1000.00000->287.05319 mz
							Ratio: 0.00% Range: 4.00 - 6.00%
							Qual Ion 2:	N/A mz
							Overlay
109-)Protocatechuic acid ethyl ester (Ethyl 3,4-Dihydroxybenzoate)							Quan Peak:	m/z181.05063 mz
	Injected		Sample		Flags
Conc:	99.989	ppb	99.989	ppb
Retention Time:		9.1069
Area:		958438135
Height:		134592749
	**MANUAL SETTINGS**
Calibration Curve
							Qual Ion 1:	1000.00000->108.02187 mz
							Ratio: 0.00% Range: 4.00 - 6.00%
							Qual Ion 2:	N/A mz
							Overlay
139-) Apiin (Apigenin-7-(2-O-apiosylglucoside)							Quan Peak:	1000.00000->565.15179 mz
	Injected		Sample		Flags
Conc:	98.369	ppb	98.369	ppb
Retention Time:		9.44664
Area:		2686083
Height:		452210
	**MANUAL SETTINGS**
Calibration Curve
							Qual Ion 1:	m/z359.07755 mz
							Ratio: 265.25% Range: 0.00 - 0.00%
							Qual Ion 2:	N/A mz
							Overlay
185-) Phloridzin							Quan Peak:	m/z435.12967 mz
	Injected		Sample		Flags
Conc:	101.756	ppb	101.756	ppb
Retention Time:		9.31462
Area:		214176230
Height:		31241249
	**MANUAL SETTINGS**
Calibration Curve
							Qual Ion 1:	1000.00000->273.07648 mz
							Ratio: 157.20% Range: 4.00 - 6.00%
							Qual Ion 2:	N/A mz
							Overlay
145-) Luteolin-7-O-glucuronide (Luteolin-7-O-β-D-glucuronide)							Quan Peak:	m/z461.07255 mz
	Injected		Sample		Flags
Conc:	97.811	ppb	97.811	ppb
Retention Time:		9.74667
Area:		148130422
Height:		20563247
	**MANUAL SETTINGS**
Calibration Curve
							Qual Ion 1:	1000.00000->285.04056 mz
							Ratio: 486.64% Range: 4.00 - 6.00%
							Qual Ion 2:	N/A mz
							Overlay
162-) Nicotiflorin (Kaempferol 3-rutinoside, Kaempferol 3-O-β –rutinoside)							Quan Peak:	m/z593.15106 mz
	Injected		Sample		Flags
Conc:	-44.668	ppb	-44.668	ppb
Retention Time:		9.45299
Area:		88235
Height:		21015
	**MANUAL SETTINGS**
Calibration Curve
							Qual Ion 1:	1000.00000->593.15143 mz
							Ratio: 180230.26% Range: 4.00 - 6.00%
							Qual Ion 2:	N/A mz
							Overlay
183-) ellagic acid							Quan Peak:	m/z300.99899 mz
	Injected		Sample		Flags
Conc:	82.044	ppb	82.044	ppb
Retention Time:		9.4181
Area:		30462172
Height:		4084874
	**MANUAL SETTINGS**
Calibration Curve
							Qual Ion 1:	1000.00000->300.99872 mz
							Ratio: 143.20% Range: 4.00 - 6.00%
							Qual Ion 2:	N/A mz
							Overlay
134-)Rhoifolin ( Apigenin 7-O- neohesperidoside)							Quan Peak:	m/z577.15692 mz
	Injected		Sample		Flags
Conc:	98.216	ppb	98.216	ppb
Retention Time:		9.57382
Area:		241960969
Height:		31760818
	**MANUAL SETTINGS**
Calibration Curve
							Qual Ion 1:	m/z431.09894 mz
							Ratio: 108.65% Range: 0.00 - 0.00%
							Qual Ion 2:	N/A mz
							Overlay
186-) Rosmarinic acid							Quan Peak:	m/z359.07724 mz
	Injected		Sample		Flags
Conc:	101.449	ppb	101.449	ppb
Retention Time:		9.48742
Area:		150580584
Height:		20612059
	**MANUAL SETTINGS**
Calibration Curve
							Qual Ion 1:	1000.00000->161.02451 mz
							Ratio: 121.50% Range: 4.00 - 6.00%
							Qual Ion 2:	N/A mz
							Overlay
137-) Apigenin 7-glucoside							Quan Peak:	m/z431.09837 mz
	Injected		Sample		Flags
Conc:	101.106	ppb	101.106	ppb
Retention Time:		9.5566
Area:		262886921
Height:		37352940
	**MANUAL SETTINGS**
Calibration Curve
							Qual Ion 1:	1000.00000->269.04480 mz
							Ratio: 68.18% Range: 4.00 - 6.00%
							Qual Ion 2:	N/A mz
							Overlay
163-) Astragalin (Kaempferol 3-glucoside)							Quan Peak:	m/z447.09328 mz
	Injected		Sample		Flags
Conc:	99.955	ppb	99.955	ppb
Retention Time:		9.72944
Area:		418864635
Height:		59945874
	**MANUAL SETTINGS**
Calibration Curve
							Qual Ion 1:	1000.00000->284.03281 mz
							Ratio: 0.00% Range: 4.00 - 6.00%
							Qual Ion 2:	N/A mz
							Overlay
182-) Kuromanine (Cyanidin 3-glucoside chloride)							Quan Peak:	m/z447.09328 mz
	Injected		Sample		Flags
Conc:	99.955	ppb	99.955	ppb
Retention Time:		9.72944
Area:		418864635
Height:		59945874
	**MANUAL SETTINGS**
Calibration Curve
							Qual Ion 1:	1000.00000->285.03970 mz
							Ratio: 68.30% Range: 4.00 - 6.00%
							Qual Ion 2:	N/A mz
							Overlay
166-) Myricetin							Quan Peak:	m/z319.04291 mz
	Injected		Sample		Flags
Conc:	280.474	ppb	280.474	ppb
Retention Time:		9.63452
Area:		10942224
Height:		1781749
	**MANUAL SETTINGS**
Calibration Curve
							Qual Ion 1:	1000.00000->287.01868 mz
							Ratio: 48.61% Range: 4.00 - 6.00%
							Qual Ion 2:	N/A mz
							Overlay
154-) Narcissin (Narcissoside, Isorhamnetin 3-rutinoside)							Quan Peak:	m/z623.16176 mz
	Injected		Sample		Flags
Conc:	97.674	ppb	97.674	ppb
Retention Time:		9.76388
Area:		73900705
Height:		10497360
	**MANUAL SETTINGS**
Calibration Curve
							Qual Ion 1:	1000.00000->315.05139 mz
							Ratio: 64.55% Range: 4.00 - 6.00%
							Qual Ion 2:	N/A mz
							Overlay
103-) Salicylic acid							Quan Peak:	m/z137.02442 mz
	Injected		Sample		Flags
Conc:	98.906	ppb	98.906	ppb
Retention Time:		9.85068
Area:		1190308318
Height:		142433444
	**MANUAL SETTINGS**
Calibration Curve
							Qual Ion 1:	1000.00000->93.03468 mz
							Ratio: 101.86% Range: 4.00 - 6.00%
							Qual Ion 2:	N/A mz
							Overlay
165-) Leucoside (Kaempferol 3-sambubioside)							Quan Peak:	m/z289.06924 mz
	Injected		Sample		Flags
Conc:	100.073	ppb	100.073	ppb
Retention Time:		9.75528
Area:		298985391
Height:		44730947
	**MANUAL SETTINGS**
Calibration Curve
							Qual Ion 1:	1000.00000->153.01778 mz
							Ratio: 72.74% Range: 0.00 - 0.00%
							Qual Ion 2:	N/A mz
							Overlay
177-) Liquiritigenin							Quan Peak:	m/z255.06628 mz
	Injected		Sample		Flags
Conc:	98.381	ppb	98.381	ppb
Retention Time:		9.81597
Area:		424516951
Height:		63106218
	**MANUAL SETTINGS**
Calibration Curve
							Qual Ion 1:	m/z255.06592 mz
							Ratio: 100.00% Range: 4.00 - 6.00%
							Qual Ion 2:	1000.00000->119.05021 mz
							Ratio: 104.71% Range: 4.00 - 6.00%
							Overlay
167-) Fisetin hydrate							Quan Peak:	m/z285.04046 mz
	Injected		Sample		Flags
Conc:	101.53	ppb	101.53	ppb
Retention Time:		9.85068
Area:		369435869
Height:		37386529
	**MANUAL SETTINGS**
Calibration Curve
							Qual Ion 1:	1000.00000->135.00900 mz
							Ratio: 55.26% Range: 4.00 - 6.00%
							Qual Ion 2:	N/A mz
							Overlay
190-) Etoposide							Quan Peak:	m/z383.11053 mz
	Injected		Sample		Flags
Conc:	98.533	ppb	98.533	ppb
Retention Time:		9.85928
Area:		99981977
Height:		14524744
	**MANUAL SETTINGS**
Calibration Curve
							Qual Ion 1:	1000.00000->229.04857 mz
							Ratio: 102.45% Range: 4.00 - 6.00%
							Qual Ion 2:	N/A mz
							Overlay
159-) Afzelin (Kaempferol 3-rhamnoside)							Quan Peak:	m/z431.09837 mz
	Injected		Sample		Flags
Conc:	101.434	ppb	101.434	ppb
Retention Time:		10.2478
Area:		338857675
Height:		51038863
	**MANUAL SETTINGS**
Calibration Curve
							Qual Ion 1:	1000.00000->285.04028 mz
							Ratio: 0.00% Range: 4.00 - 6.00%
							Qual Ion 2:	N/A mz
							Overlay
136-) Apigenin 7-glucuronide							Quan Peak:	m/z445.07763 mz
	Injected		Sample		Flags
Conc:	101.937	ppb	101.937	ppb
Retention Time:		10.3517
Area:		186649141
Height:		25708662
	**MANUAL SETTINGS**
Calibration Curve
							Qual Ion 1:	1000.00000->269.04535 mz
							Ratio: 115.98% Range: 4.00 - 6.00%
							Qual Ion 2:	N/A mz
							Overlay
117-)trans Cinnamic acid							Quan Peak:	m/z147.04515 mz
	Injected		Sample		Flags
Conc:	87.223	ppb	87.223	ppb
Retention Time:		10.2306
Area:		6678324
Height:		981140
	**MANUAL SETTINGS**
Calibration Curve
							Qual Ion 1:	1000.00000->147.04510 mz
							Ratio: 4.51% Range: 4.00 - 6.00%
							Qual Ion 2:	N/A mz
							Overlay
158-) Kaempferol							Quan Peak:	m/z287.05350 mz
	Injected		Sample		Flags
Conc:	99.063	ppb	99.063	ppb
Retention Time:		10.2564
Area:		342274421
Height:		46490835
	**MANUAL SETTINGS**
Calibration Curve
							Qual Ion 1:	1000.00000->287.05359 mz
							Ratio: 370.59% Range: 0.00 - 0.00%
							Qual Ion 2:	N/A mz
							Overlay
152-) Quercetin							Quan Peak:	m/z301.03538 mz
	Injected		Sample		Flags
Conc:	101.867	ppb	101.867	ppb
Retention Time:		10.4378
Area:		329069392
Height:		44485783
	**MANUAL SETTINGS**
Calibration Curve
							Qual Ion 1:	1000.00000->151.00342 mz
							Ratio: 154.10% Range: 4.00 - 6.00%
							Qual Ion 2:	N/A mz
							Overlay
169-) Naringenin							Quan Peak:	m/z271.06120 mz
	Injected		Sample		Flags
Conc:	92.141	ppb	92.141	ppb
Retention Time:		10.4378
Area:		1024722138
Height:		131681457
	**MANUAL SETTINGS**
Calibration Curve
							Qual Ion 1:	1000.00000->119.05035 mz
							Ratio: 31.49% Range: 4.00 - 6.00%
							Qual Ion 2:	N/A mz
							Overlay
164-) Tiliroside							Quan Peak:	m/z595.14264 mz
	Injected		Sample		Flags
Conc:	102.455	ppb	102.455	ppb
Retention Time:		10.6543
Area:		138856159
Height:		19995892
	**MANUAL SETTINGS**
Calibration Curve
							Qual Ion 1:	1000.00000->147.04356 mz
							Ratio: 181.79% Range: 4.00 - 6.00%
							Qual Ion 2:	N/A mz
							Overlay
144-) Luteolin							Quan Peak:	m/z285.04046 mz
	Injected		Sample		Flags
Conc:	101.505	ppb	101.505	ppb
Retention Time:		10.7148
Area:		510132897
Height:		75392216
	**MANUAL SETTINGS**
Calibration Curve
							Qual Ion 1:	1000.00000->175.04039 mz
							Ratio: 7.06% Range: 4.00 - 6.00%
							Qual Ion 2:	N/A mz
							Overlay
179-) Genistein (5,7-Dihydroxy-3-(4-hydroxyphenyl)-4H-chromen-4-one)							Quan Peak:	m/z269.04555 mz
	Injected		Sample		Flags
Conc:	96.692	ppb	96.692	ppb
Retention Time:		10.6976
Area:		713731993
Height:		103487602
	**MANUAL SETTINGS**
Calibration Curve
							Qual Ion 1:	1000.00000->269.04555 mz
							Ratio: 30.34% Range: 4.00 - 6.00%
							Qual Ion 2:	N/A mz
							Overlay
132-)Apigenin (5,7-Dihydroxy-2-(4-hydroxyphenyl)-4H-chromen-4-one)							Quan Peak:	m/z269.04555 mz
	Injected		Sample		Flags
Conc:	100.558	ppb	100.558	ppb
Retention Time:		11.251
Area:		755200779
Height:		109015168
	**MANUAL SETTINGS**
Calibration Curve
							Qual Ion 1:	1000.00000->117.03464 mz
							Ratio: 0.19% Range: 4.00 - 6.00%
							Qual Ion 2:	N/A mz
							Overlay
156-) Isorhamnetin (Quercetin 3′-methyl ether)							Quan Peak:	m/z315.05103 mz
	Injected		Sample		Flags
Conc:	101.911	ppb	101.911	ppb
Retention Time:		11.1993
Area:		208900181
Height:		28578431
	**MANUAL SETTINGS**
Calibration Curve
							Qual Ion 1:	1000.00000->300.02780 mz
							Ratio: 103.82% Range: 4.00 - 6.00%
							Qual Ion 2:	N/A mz
							Overlay
146-) Diosmetin (Luteolin 4′-methyl ether)							Quan Peak:	m/z299.05611 mz
	Injected		Sample		Flags
Conc:	101.911	ppb	101.911	ppb
Retention Time:		11.2859
Area:		454660998
Height:		62856464
	**MANUAL SETTINGS**
Calibration Curve
							Qual Ion 1:	1000.00000->284.03290 mz
							Ratio: 136.49% Range: 4.00 - 6.00%
							Qual Ion 2:	N/A mz
							Overlay
181-) Formononetin (Neochanin)							Quan Peak:	m/z267.06628 mz
	Injected		Sample		Flags
Conc:	100.79	ppb	100.79	ppb
Retention Time:		11.3551
Area:		1036212502
Height:		155679476
	**MANUAL SETTINGS**
Calibration Curve
							Qual Ion 1:	1000.00000->252.04263 mz
							Ratio: 104.58% Range: 4.00 - 6.00%
							Qual Ion 2:	N/A mz
							Overlay
170-) Sakuranetin (Naringenin 7-O-methyl ether)							Quan Peak:	m/z285.07685 mz
	Injected		Sample		Flags
Conc:	97.058	ppb	97.058	ppb
Retention Time:		11.649
Area:		359823086
Height:		55637195
	**MANUAL SETTINGS**
Calibration Curve
							Qual Ion 1:	1000.00000->119.05032 mz
							Ratio: 6.63% Range: 4.00 - 6.00%
							Qual Ion 2:	N/A mz
							Overlay
120-)Caffeic acid phenhyl ester (CAPE)							Quan Peak:	m/z283.09758 mz
	Injected		Sample		Flags
Conc:	98.381	ppb	98.381	ppb
Retention Time:		11.9428
Area:		1328073431
Height:		188043729
	**MANUAL SETTINGS**
Calibration Curve
							Qual Ion 1:	1000.00000->135.04526 mz
							Ratio: 22.57% Range: 4.00 - 6.00%
							Qual Ion 2:	N/A mz
							Overlay
131-)Chrysin (5,7-Dihydroxy-2-phenyl-4H-chromen-4-one)							Quan Peak:	m/z253.05063 mz
	Injected		Sample		Flags
Conc:	98.095	ppb	98.095	ppb
Retention Time:		12.1336
Area:		1094888225
Height:		163285101
	**MANUAL SETTINGS**
Calibration Curve
							Qual Ion 1:	1000.00000->253.05063 mz
							Ratio: 2.92% Range: 4.00 - 6.00%
							Qual Ion 2:	N/A mz
							Overlay
160-) Kaempferide							Quan Peak:	m/z299.05611 mz
	Injected		Sample		Flags
Conc:	96.298	ppb	96.298	ppb
Retention Time:		12.3067
Area:		626730130
Height:		81661134
	**MANUAL SETTINGS**
Calibration Curve
							Qual Ion 1:	1000.00000->284.03265 mz
							Ratio: 0.00% Range: 4.00 - 6.00%
							Qual Ion 2:	N/A mz
							Overlay
151-) Galangin (3,5,7-Trihydroxy-2-phenyl-4H-chromen-4-one)							Quan Peak:	m/z269.04555 mz
	Injected		Sample		Flags
Conc:	95.396	ppb	95.396	ppb
Retention Time:		12.2719
Area:		994473078
Height:		133963901
	**MANUAL SETTINGS**
Calibration Curve
							Qual Ion 1:	1000.00000->269.04555 mz
							Ratio: 96.43% Range: 4.00 - 6.00%
							Qual Ion 2:	N/A mz
							Overlay
133-)Acacetin (5,7-Dihydroxy-2-(4-methoxyphenyl)-4H-chromen-4-one)							Quan Peak:	m/z283.06120 mz
	Injected		Sample		Flags
Conc:	97.074	ppb	97.074	ppb
Retention Time:		12.3411
Area:		2237162087
Height:		249910507
	**MANUAL SETTINGS**
Calibration Curve
							Qual Ion 1:	1000.00000->268.03717 mz
							Ratio: 125.22% Range: 4.00 - 6.00%
							Qual Ion 2:	N/A mz
							Overlay
138-)Genkwanin(4’,5-Dihydroxy-7-metthoxyflavone, Apigenin 7-O-methyl ether)							Quan Peak:	m/z283.06120 mz
	Injected		Sample		Flags
Conc:	97.074	ppb	97.074	ppb
Retention Time:		12.3411
Area:		2237162087
Height:		249910507
	**MANUAL SETTINGS**
Calibration Curve
							Qual Ion 1:	1000.00000->268.03745 mz
							Ratio: 124.90% Range: 4.00 - 6.00%
							Qual Ion 2:	N/A mz
							Overlay
187-) Glabridin							Quan Peak:	m/z323.12888 mz
	Injected		Sample		Flags
Conc:	99.374	ppb	99.374	ppb
Retention Time:		12.6527
Area:		926933396
Height:		143203813
	**MANUAL SETTINGS**
Calibration Curve
							Qual Ion 1:	1000.00000->135.04533 mz
							Ratio: 34.74% Range: 4.00 - 6.00%
							Qual Ion 2:	N/A mz
							Overlay
189-) emodin							Quan Peak:	m/z269.04555 mz
	Injected		Sample		Flags
Conc:	89.092	ppb	89.092	ppb
Retention Time:		13.38
Area:		1311715222
Height:		176926785
	**MANUAL SETTINGS**
Calibration Curve
							Qual Ion 1:	1000.00000->225.05573 mz
							Ratio: 32.41% Range: 4.00 - 6.00%
							Qual Ion 2:	N/A mz
							Overlay

## Sheet: Sheet2_100ppb-3
Confirmation Report
Lab Name:	Default Laboratory
Instrument:	Thermo Scientific Instrument					Method:	FENOLICQUAN-13_FENILICQUAN
User:	Thermo						FENILICQUAN
Batch:	FENOLICQUAN-13					Cali File:	FENOLICQUAN-13.calx
Vial Pos	Sample ID		File Name		Level	Sample Name		File Date	Comment
ga6			100ppb-3		100			2022-12-24 17:08:31
The following compounds were not found in the sample.
Compound Name						Expected Retention Time
126-)C vitamini (L-ascorbic acid)						0
194-) Capsaicin						0
172-) Taxifolin						6.64
142-) Rutin trihydrate M-3H2O						8.31
